# Supplementary material for: Static phase transfer catalysis for Williamson reactions: Pickering interfacial catalysis
Source: Royal Society of Chemistry journal article supplement (doi:10.1039/c9cy00620f), 2019-01-01
Supplement: c9cy00620f1.pdf [file c9cy00620f1.pdf]

**Supplementary Information**

**Static Phase Transfer Catalysis for Williamson  
Reactions: Pickering Interfacial Catalysis**

Qianqiang Zhao <sup>ab</sup>, Xiao Zhao <sup>ab</sup>, Hui Peng <sup>ab</sup>, Yang Liu <sup>ab</sup>, Lihui Yang <sup>ab</sup>,  
Jie Sun <sup>abc</sup>, Lei Yang <sup>\*ab</sup>, Yifeng Shen <sup>ab</sup>

<sup>a</sup> Key Laboratory of Advance Textile Materials and Manufacturing  
Technology, Ministry of Education, College of Materials and Textiles,  
Zhejiang Sci-Tech University, Hangzhou 310018, Zhejiang, China

<sup>b</sup> Engineering Research Center for Eco-Dyeing & Finishing of Textiles,  
Ministry of Education, College of Materials and Textiles, Zhejiang Sci-  
Tech University, Hangzhou 310018, Zhejiang, China

c. Zhejiang Province New Textile Research & Development  
Emphasized Laboratory, Hangzhou 310009

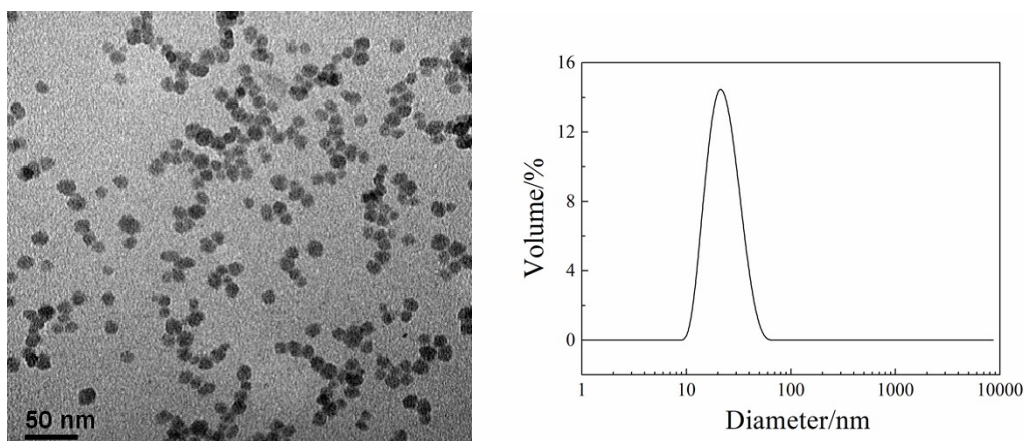

**Figure S1. TEM image of the silica particle and Size distribution measured by light diffraction.**

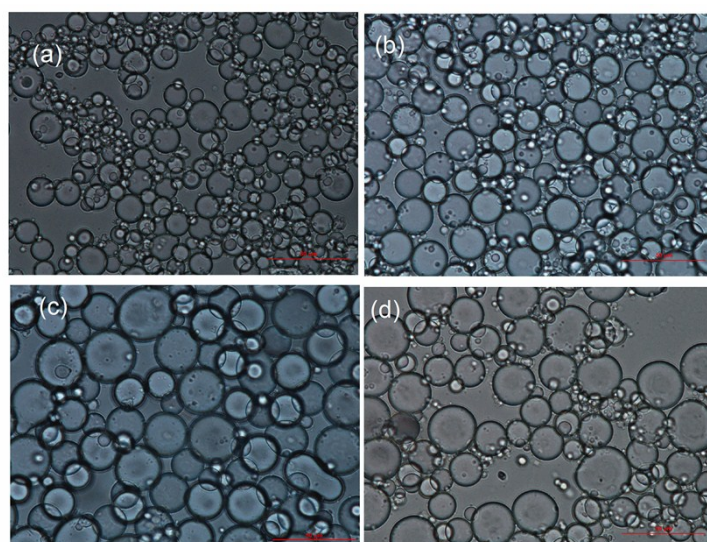

**Figure S2. Optical micrographs of diisopropyl ketone-in-water (1:1) emulsions stabilized by mixtures of 2 wt. % silica and TBAB at different concentration taken at 5h after preparation. [TBAB] (from A to D): 2%, 4%, 6%, 8% (mol)**

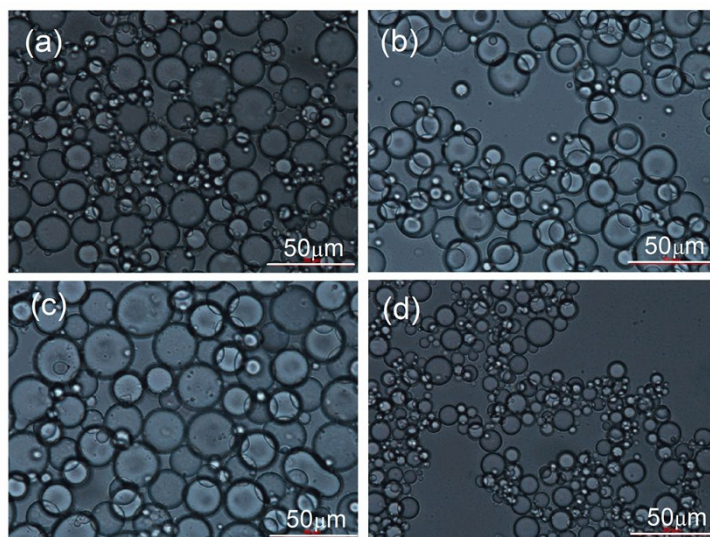

**Figure S3. Optical micrographs of diisopropyl ketone-in-water (1:1) emulsions stabilized by mixtures of 2 wt. % silica, 5 mol % of DTAB and 5% (mol) of phase transfer catalyst taken at 5h after preparation. PTCs (from a to d): None, TEAB, TBAB, 18-Crown-6.**

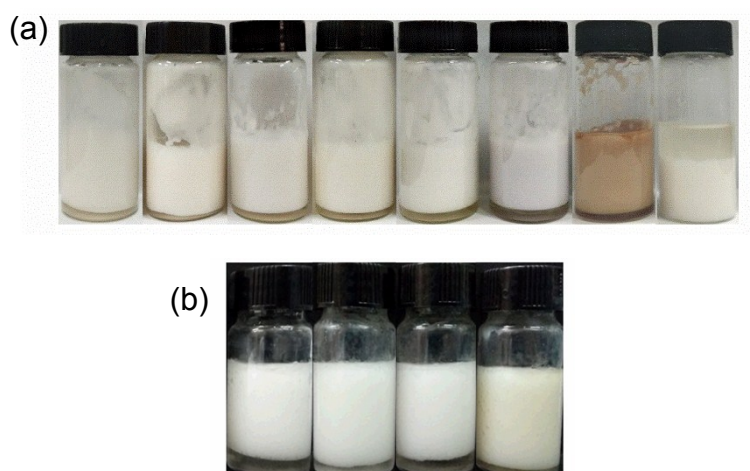

**Figure S4. Photographs of diisopropyl ketone-in-water (1:1) emulsions stabilized by mixtures of silica and 5 mol % of DTAB for Willamism reaction, (a) reactant from left to right: p-cresol, o-cresol, 4-methoxyphenol, 2-methoxyphenol, o-chlorophenol, phenol, vanillin and p-tert-butylphenol with 4-Nitrobenzyl bromide; (b) reactant from left to right: benzyl bromide, 4-(Bromomethyl)benzonitrile, 2,6-Dichlorobenzyl Bromide, 2-Nitrobenzyl bromide with p-cresol**
